# Supplementary material for: Double Mutation of Days to Heading 2 and CONSTANS 3 Improves Agronomic Performance of Japonica Rice under Short Daylight Conditions in Southern China
Source: MDPI journal article supplement (doi:10.3390/ijms24087346), 2023-04-16
Supplement: s1 [file s1]

Supplementary materials

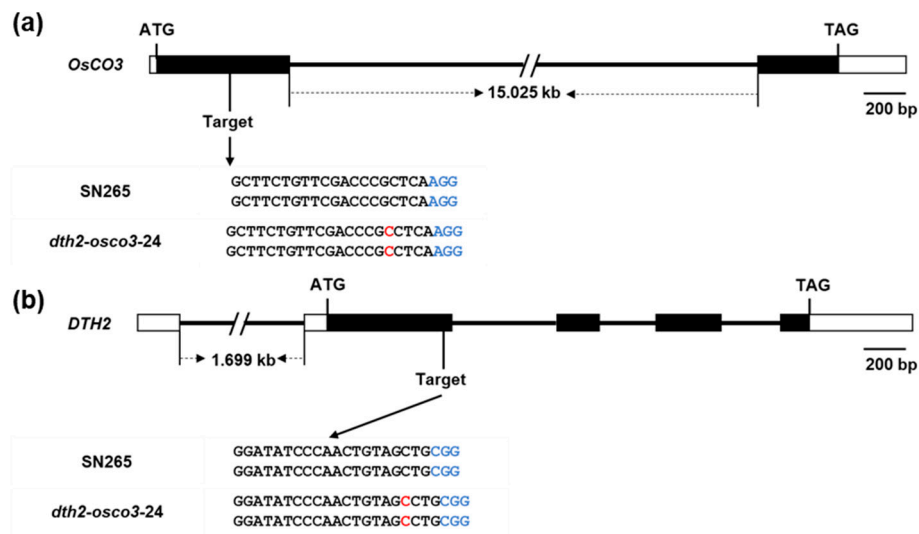

**Figure S1.** Schematic diagram and the position of the editing target site of the *OsCO3* and *DTH2*. Black boxes and lines in between represent exons and introns, respectively. The target sequence is shown in black and the PAM sequence (NGG) in blue. Underneath the target sequence is the sequence alignment to show the 1-bp insertion (highlighted in red) induced by gene editing in an independent transgenic line (*dth2-osco3-24*) (a and b).

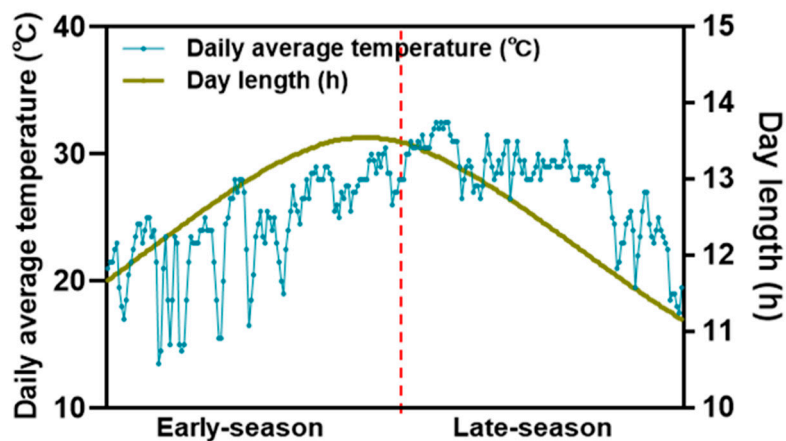

**Figure S2.** Relationship between day-length and the daily average temperature in two seasons.

**Table S1.** Amplification primers for expression cassettes.

| Primer Names                 | Sequences (5'-3')                     |
|------------------------------|---------------------------------------|
| <i>DTH2</i> -gRT1            | GATATCCCAACTGTAGCTGGTTTCAGAGCTAGAAAT  |
| <i>DTH2</i> -OsU6bT1         | CAGCTACAGTTGGGATATCCAACACAAGCGGCAGC   |
| <i>OsCO3</i> -gRT1           | GCTTCTGTTCGACCCGCTCAGTTTCAGAGCTAGAAAT |
| <i>OsCO3</i> -OsU3T1         | TGAGCGGGTCGAACAGAAGCTGCCACGGATCATCTGC |
| <i>OsLFL1</i> -gRT1          | TACAGCGACGTAAGCCAGCTGTTTCAGAGCTAGAAAT |
| <i>OsLFL1</i> -OsU6aT1       | AGCTGGCTTACGTCGCTGTACGGCAGCCAAGCCAGCA |
| <i>SDG725</i> -gRT1          | CTGTACCACCAGCACCTGCTGTTTCAGAGCTAGAAAT |
| <i>SDG725</i> -OsU6aT1       | AGCAGGTGCTGGTGGTACAGCGGCAGCCAAGCCAGCA |
| <i>OsGS1</i> -gRT1           | AGAGTACACCCTCCTCCAGAGTTTCAGAGCTAGAAAT |
| <i>OsGS1</i> -OsU6bT1        | TCTGGAGGAGGGTGTACTCTCAACACAAGCGGCAGC  |
| <i>OsDof12</i> -gRT1         | ACAAGATCCTGCCGTGCCCCGTTTCAGAGCTAGAAAT |
| <i>OsDof12</i> -OsU6cT1      | GGGGCACGGCAGGATCTTGTCTGAGCCTCAGCGCAG  |
| <i>OsNF-YC2</i> -gRT1        | GCGTGCGAGCTCTTCATCCGTTTCAGAGCTAGAAAT  |
| <i>OsNF-YC2</i> -<br>OsU6cT1 | GGATGAAGAGCTCGCACGCCTGAGCCTCAGCGCAG   |
| <i>OsPUP7</i> -gRT1          | TCGTCATCGGCGCCCTGATGGTTTCAGAGCTAGAAAT |
| <i>OsPUP7</i> -OsU3T1        | CATCAGGGCGCCGATGACGATGCCACGGATCATCTGC |
| <i>DTH2</i> -gRT1            | GATATCCCAACTGTAGCTGGTTTCAGAGCTAGAAAT  |

**Table S2.** Detection primers for target sites mutation.

| Primer Names                | Sequences (5'-3')                      |
|-----------------------------|----------------------------------------|
| NGS- <i>DTH2</i> -F         | CTCGGAGTGATCGCACGGCAGACCATAAACTGTTAC   |
| NGS- <i>DTH2</i> -R         | CTGAGAGGCTGGATGGGCTGTGCTAGCTATATCCAAC  |
| NGS- <i>OsCO3</i> -F        | CTCGGAGTGATCGCACGTGTCAACTCCTCCTGGCCA   |
| NGS- <i>OsCO3</i> -R        | CTGAGAGGCTGGATGGTTCGACGACGCTCCTCCTTCT  |
| NGS- <i>OsLFL1</i> -F       | CTCGGAGTGATCGCACGGGCAGATTTATTCTGAACGT  |
| NGS- <i>OsLFL1</i> -R       | CTGAGAGGCTGGATGGGGTGTACTGAAGCAAATACCC  |
| NGS- <i>SDG725</i> -F       | CTCGGAGTGATCGCACCCCTGCTGCTGAACTTGTATTC |
| NGS- <i>SDG725</i> -R       | CTGAGAGGCTGGATGGGGCAGGATGGAAATCAATACC  |
| NGS- <i>OsGS1</i> -F        | CTCGGAGTGATCGCACGTCACAGCCATCTCAGCATAA  |
| NGS- <i>OsGS1</i> -R        | CTGAGAGGCTGGATGGAAGCCACAATCAAACAGAC    |
| NGS- <i>OsDof12</i> -F      | CTCGGAGTGATCGCACAGAGGTCGTCGACACCGAGGA  |
| NGS- <i>OsDof12</i> -R      | CTGAGAGGCTGGATGGTCCAGTACCTCTGGCAGTTC   |
| NGS- <i>OsNF-YC2</i> -<br>F | CTCGGAGTGATCGCACTGGCGCGGATCAAGAAGATCAT |
| NGS- <i>OsNF-YC2</i> -<br>R | CTGAGAGGCTGGATGGCGACGAGGAAGTCGAACACGTC |
| NGS- <i>OsPUP7</i> -F       | CTCGGAGTGATCGCACTGGTGACGCTGGTGCAGTC    |
| NGS- <i>OsPUP7</i> -R       | CTGAGAGGCTGGATGGTGAACGCGAGCTGCGTCGACA  |

**Table S3.** Primers for qRT-PCR reaction.

| Primer Names            | Sequences (5'-3')          |
|-------------------------|----------------------------|
| qRT- <i>DTH2</i> -F     | GAGATGGGATGAATCTTCTGC      |
| qRT- <i>DTH2</i> -R     | GTCTCCATATACGCTCCCATCA     |
| qRT- <i>OsCO3</i> -F    | CAATTCAGGCGCGGGTACA        |
| qRT- <i>OsCO3</i> -R    | GAGGTGGTGATGTCTGGCAC       |
| qRT- <i>Hd3a</i> -F     | GTCTACCCCTAGCTAACGATGA     |
| qRT- <i>Hd3a</i> -R     | CACCATCATATATATGTTGTGTGTCG |
| qRT- <i>OsMADS14</i> -F | CGGTTGCGAGACGAGGAA         |
| qRT- <i>OsMADS14</i> -R | GAAAGACGGTGCTGGACGAA       |
| <i>Actin1</i> -3A       | ACCACAGGTAGCAATAGGTA       |
| <i>Actin1</i> -5B       | CACATTCCAGCAGATGTGG        |
